# Supplementary material
Source: publisher figshare collection journal article supplement (https://acs.figshare.com/ndownloader/files/5148196)
Supplement: Supplementary file 1 [file 5148196]

## Supporting Information

### **Nitrogen-Doping Enhanced Fluorescent Carbon Dots: Green Synthesis and Their Applications for Bioimaging and Label-Free Detection of Au<sup>3+</sup> Ions**

Jie Liao, Zehong Cheng, and Li Zhou\*

*Guangxi Ministry-Province Jointly-Constructed Cultivation Base for State Key Laboratory of Processing for Nonferrous Metal and Featured Materials, MOE Key Laboratory of New Processing Technology for Nonferrous Metal and Materials, and College of Materials Science and Engineering, Guilin University of Technology, Guilin 541004, P. R. China*

**Table S1**

**Table S1.** Weight and atomic percentages of N-CDs based on the elemental analysis and XPS results.

| Sample | Elemental analysis <sup>a</sup> |      |     |                | XPS <sup>b</sup> |      |      |
|--------|---------------------------------|------|-----|----------------|------------------|------|------|
|        | C                               | N    | H   | O (Calculated) | C                | N    | O    |
| N-CDs  | 47.6                            | 14.1 | 9.7 | 28.6           | 55.6             | 12.6 | 31.8 |

<sup>a</sup> Weight percentage. <sup>b</sup> Atom percentage.

**Figure S1**

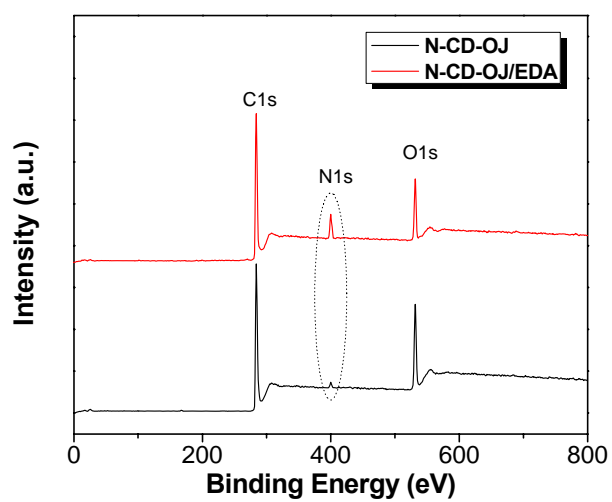

**Figure S1.** XPS survey spectra of N-CD-OJ and N-CD-OJ/EDA samples. The content of N element for N-CD-OJ and N-CD-OJ/EDA are 2.4 % and 10.7 %, respectively.

**Figure S2**

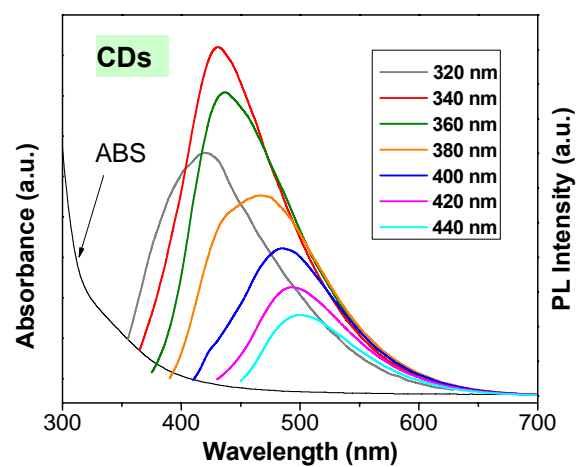

**Figure S2.** UV-vis absorption spectrum (ABS) and fluorescent emission spectra of undoped PGP-derived CDs upon excitation at diverse wavelengths.

**Figure S3**

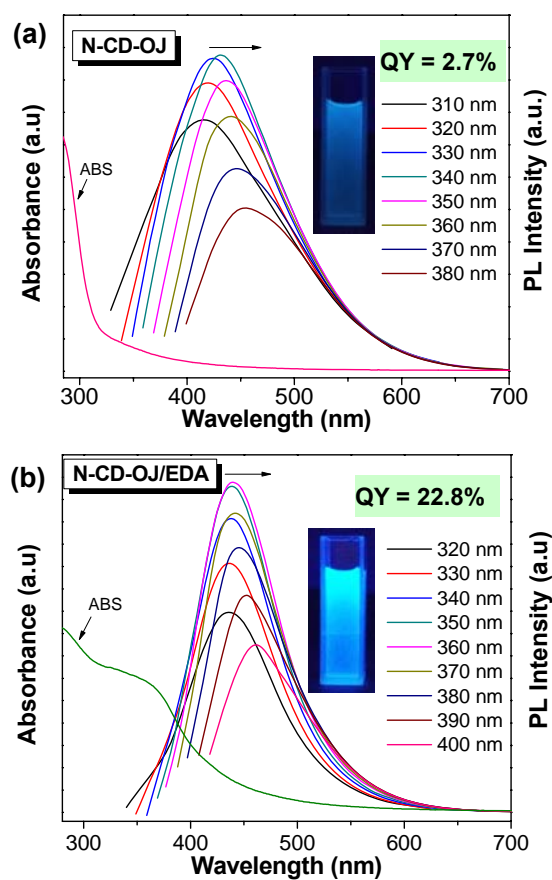

**Figure S3.** (a) UV-vis absorption spectrum (ABS) and fluorescent emission spectra of N-CD-OJ aqueous solution upon excitation at diverse wavelengths. Inset: photograph of N-CD-OJ aqueous solution under 365 nm UV light. (b) UV-vis absorption spectrum (ABS) and fluorescent emission spectra of N-CD-OJ/EDA aqueous solution upon excitation at diverse wavelengths. Inset: photograph of N-CD-OJ/EDA aqueous solution under 365 nm UV light.

**Figure S4**

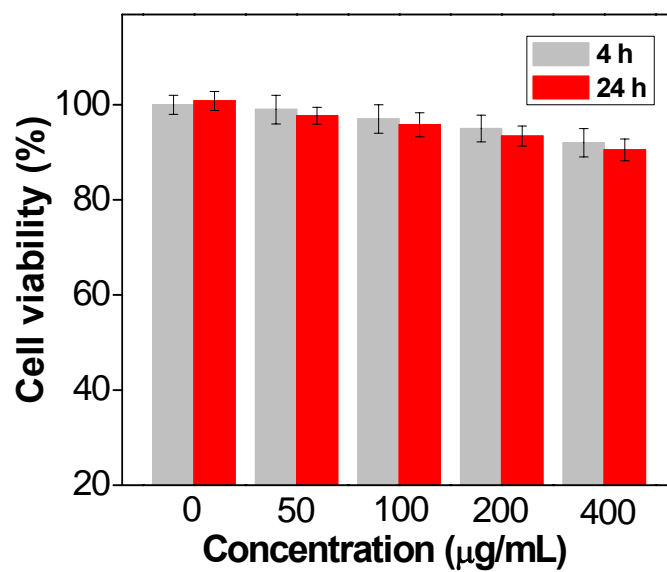

**Figure S4.** Cell viability of NIH-3T3 cells after incubation with N-CDs at varying concentrations for 4 and 24 h, respectively.

**Figure S5**

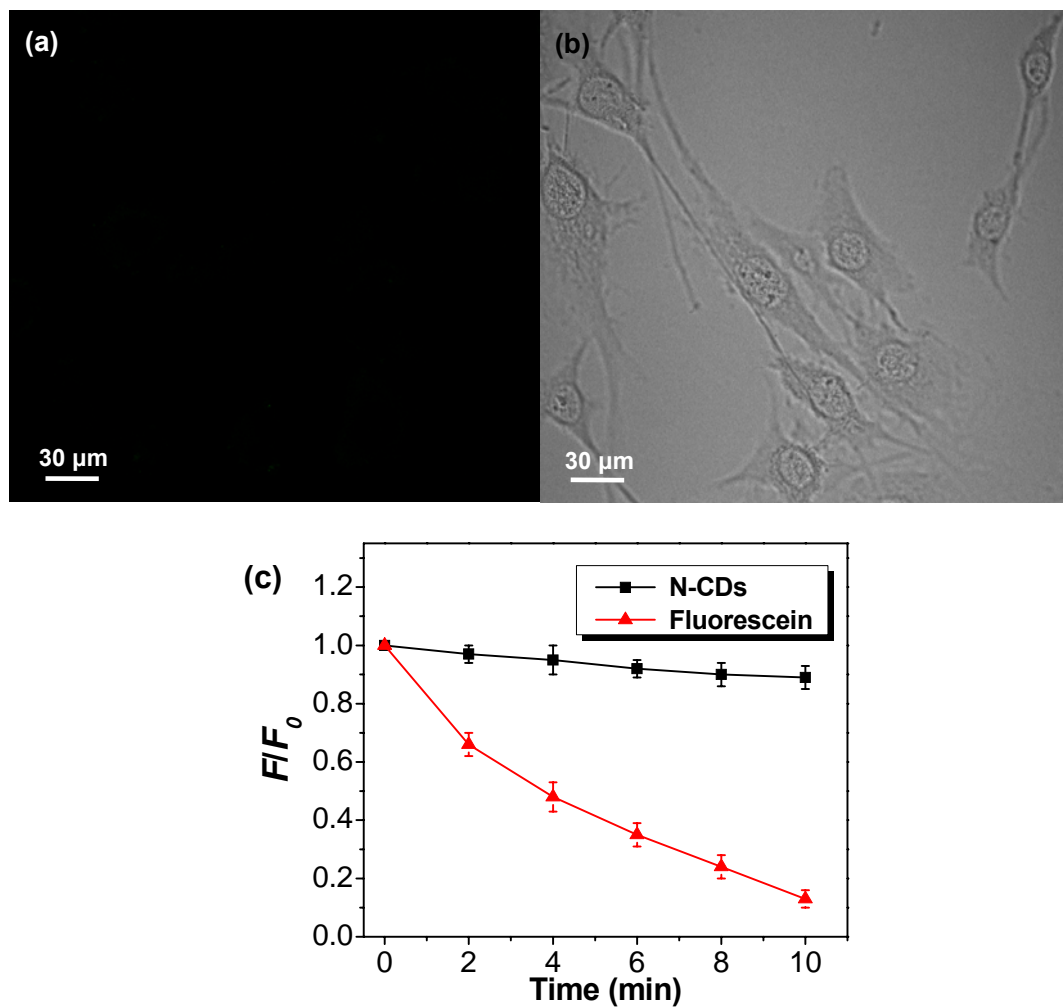

**Figure S5.** CLSM image (a) and bright-field image (b) of MCF-7 cells without incubation of N-CDs. (c) Illumination time-dependent fluorescence intensity ratio ( $F/F_0$ ) of N-CDs and fluorescein.  $F_0$  and  $F$  are the emission intensities of N-CDs and fluorescein without and with illumination for different time, respectively.

**Figure S6**

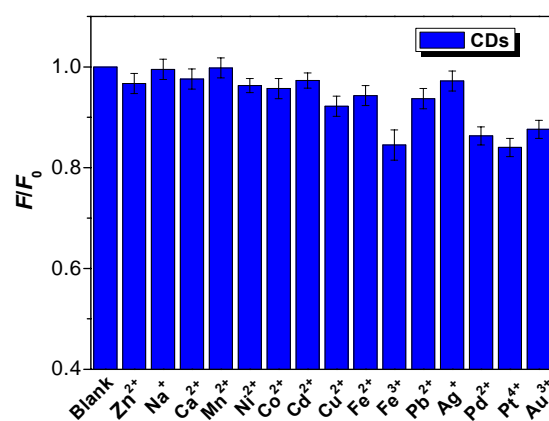

**Figure S6.**  $F/F_0$  value of undoped PGP-derived CDs aqueous solutions containing diverse metal ions at 50  $\mu$ M each.



**Figure S7**

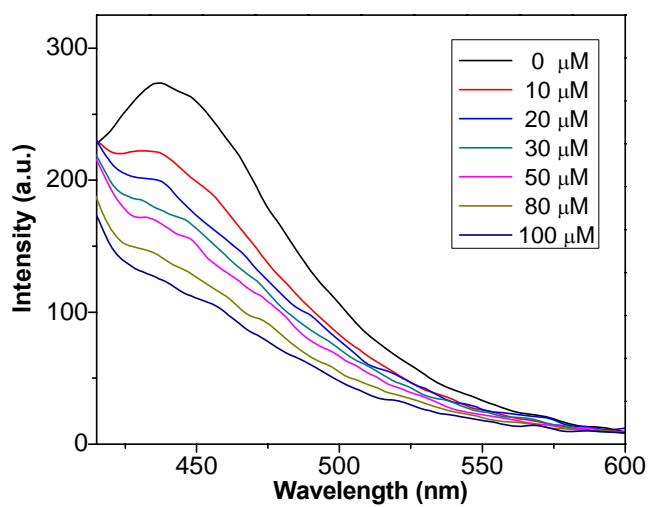

**Figure S7.** Fluorescent emission spectra of N-CD-OJ/EDA aqueous solution upon addition of various concentrations of Au<sup>3+</sup> ions ( $\lambda_{\text{ex}} = 360$  nm).

**Figure S8**

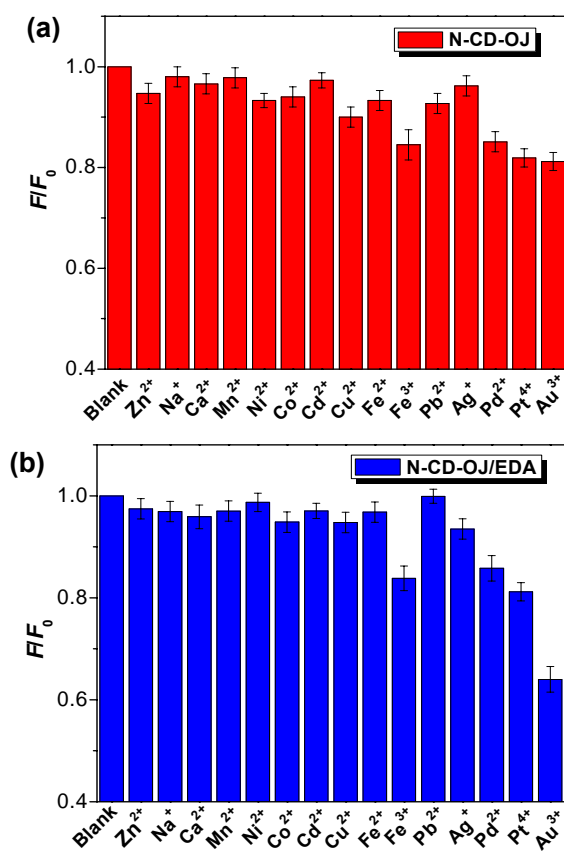

**Figure S8.**  $F/F_0$  value of N-CD-OJ (a) and N-CD-OJ/EDA (b) aqueous solutions containing diverse metal ions at 50  $\mu$ M each.
